# Supplementary material for: Conventional and unconventional secretory proteins expressed with silkworm bombyxin signal peptide display functional fidelity
Source: PubMed Central journal article supplement (PMC5670176; doi:10.1038/s41598-017-14833-8), 2017-11-03
Supplement: 41598_2017_14833_MOESM1_ESM.pdf [file 41598_2017_14833_MOESM1_ESM.pdf]

Supporting information

**Conventional and unconventional secretory proteins  
expressed with silkworm bombyxin signal peptide  
display functional fidelity**

Sungjo Park<sup>1,2</sup>, D. Kent Arrell<sup>1,2</sup>, Santiago Reyes<sup>1,2</sup>,

Enoch Y Park<sup>3</sup> and Andre Terzic<sup>1,2</sup>

<sup>1</sup>Center for Regenerative Medicine, Mayo Clinic, Rochester, Minnesota, USA

<sup>2</sup>Marriott Heart Disease Research Program, Departments of Cardiovascular Diseases, Medicine, Molecular Pharmacology and Experimental Therapeutics, and Medical Genetics, Mayo Clinic, Rochester, Minnesota, USA

<sup>3</sup>Laboratory of Biotechnology, Graduate School of Science and Technology, Shizuoka University, Shizuoka, Japan

\*Corresponding author: A. Terzic, Mayo Clinic, 200 First Street SW, Rochester, MN 55905, USA;  
Tel: +1 507-284-5514; Fax: +1 507-266-9936; E-mail: [terzic.andre@mayo.edu](mailto:terzic.andre@mayo.edu)

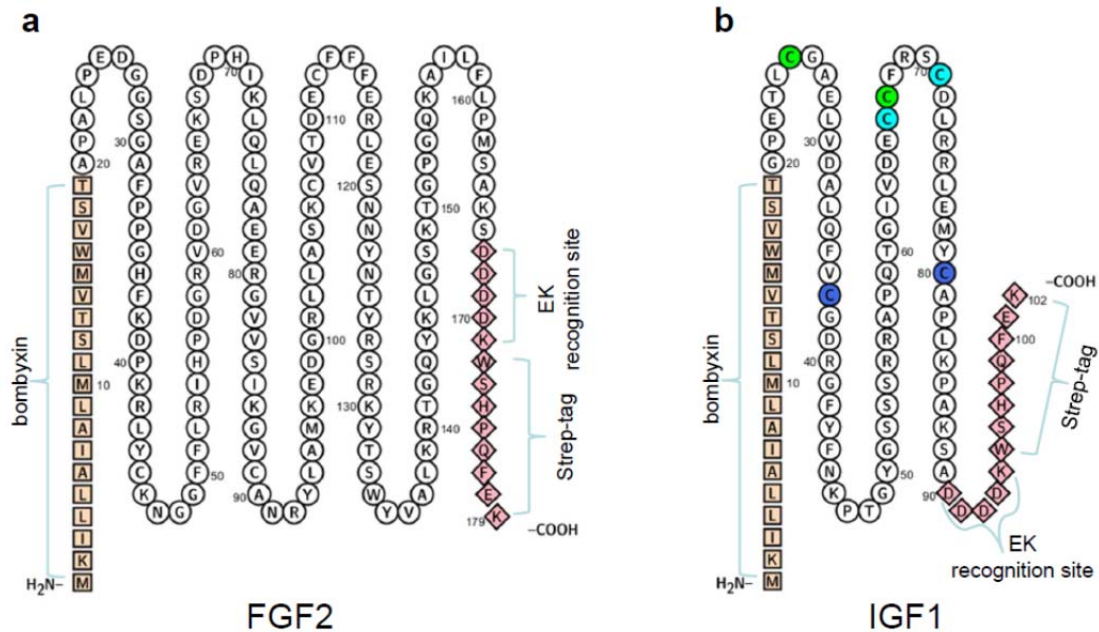

**Supplementary Figure S1.** Amino acid sequences of human Ala-FGF2 (UniProt accession: P09038) and IGF1 (UniProt accession: P05019) constructs containing an amino-terminal bombyxin signal peptide, a carboxy-terminal enterokinase (EK) cleavage site and Strep-tag. To avoid abrupt conformational change introduced by the N-terminal proline of FGF2 near the junction between bombyxin signal peptide and mature FGF2, an alanine residue (Ala at position 20) was added to the N-terminus of FGF2. Cysteine residues forming disulfide bonds in IGF1 are colored with disulfide pairs in green, cyan and blue. Illustrations of primary sequences were generated using Protter (<http://wlab.ethz.ch/protter/start/>).
